# Supplementary material
Source: PubMed Central journal article supplement (PMC2957792)

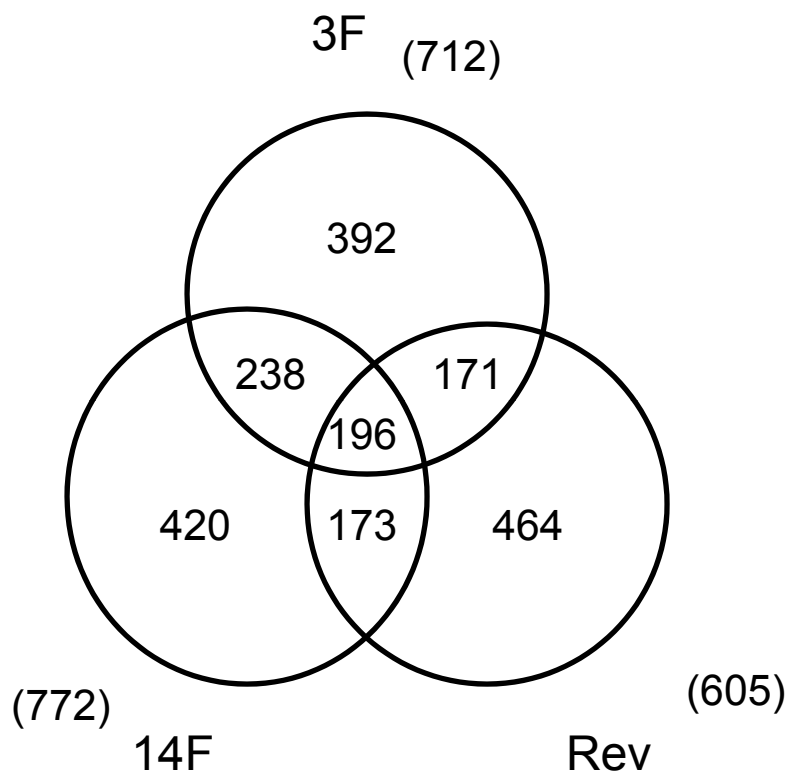

3F

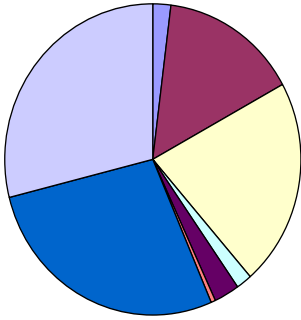

14F

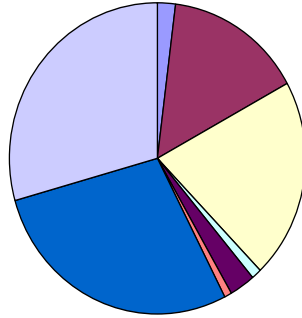

Rev

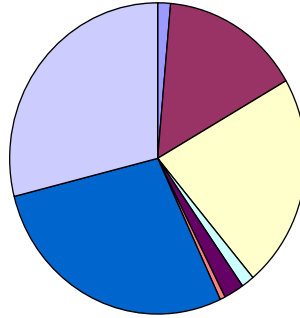

### Cellular component

- membrane enclosed lumen
- macromolecular complex
- organelle
- extracellular region
- organelle part
- envelope
- cell part
- cell

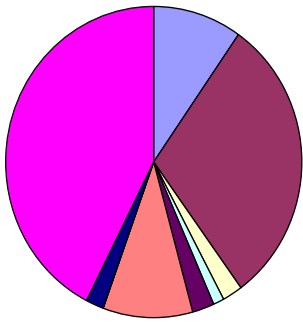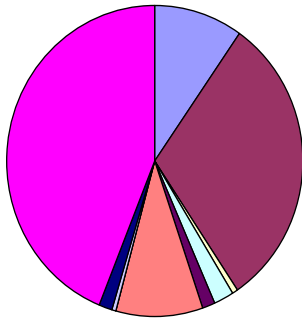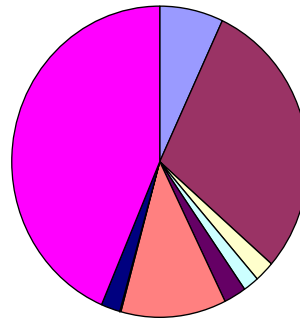

### Molecular function

- transporter activity
- catalytic activity
- translation regulator activity
- molecular transducer activity
- transcription regulator activity
- structural molecule activity
- electron carrier activity
- antioxidant activity
- enzyme regulator activity
- binding

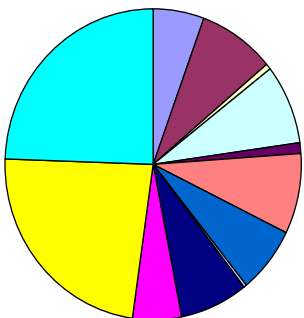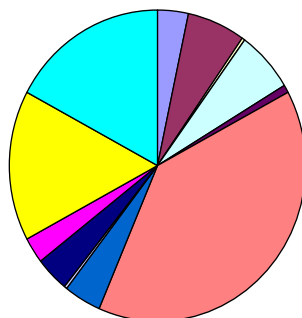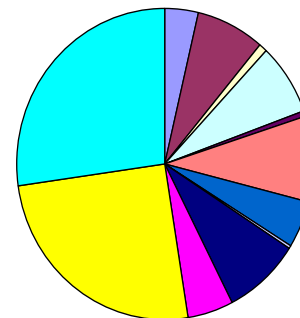

### Biological process

- multicellular organismal process
- localisation
- growth
- establishment of localisation
- reproduction
- biological regulation
- developmental process
- viral reproduction
- regulation of biological process
- response to stimulus
- metabolic process
- cellular process

# Differential GO-term distribution (%) sequences

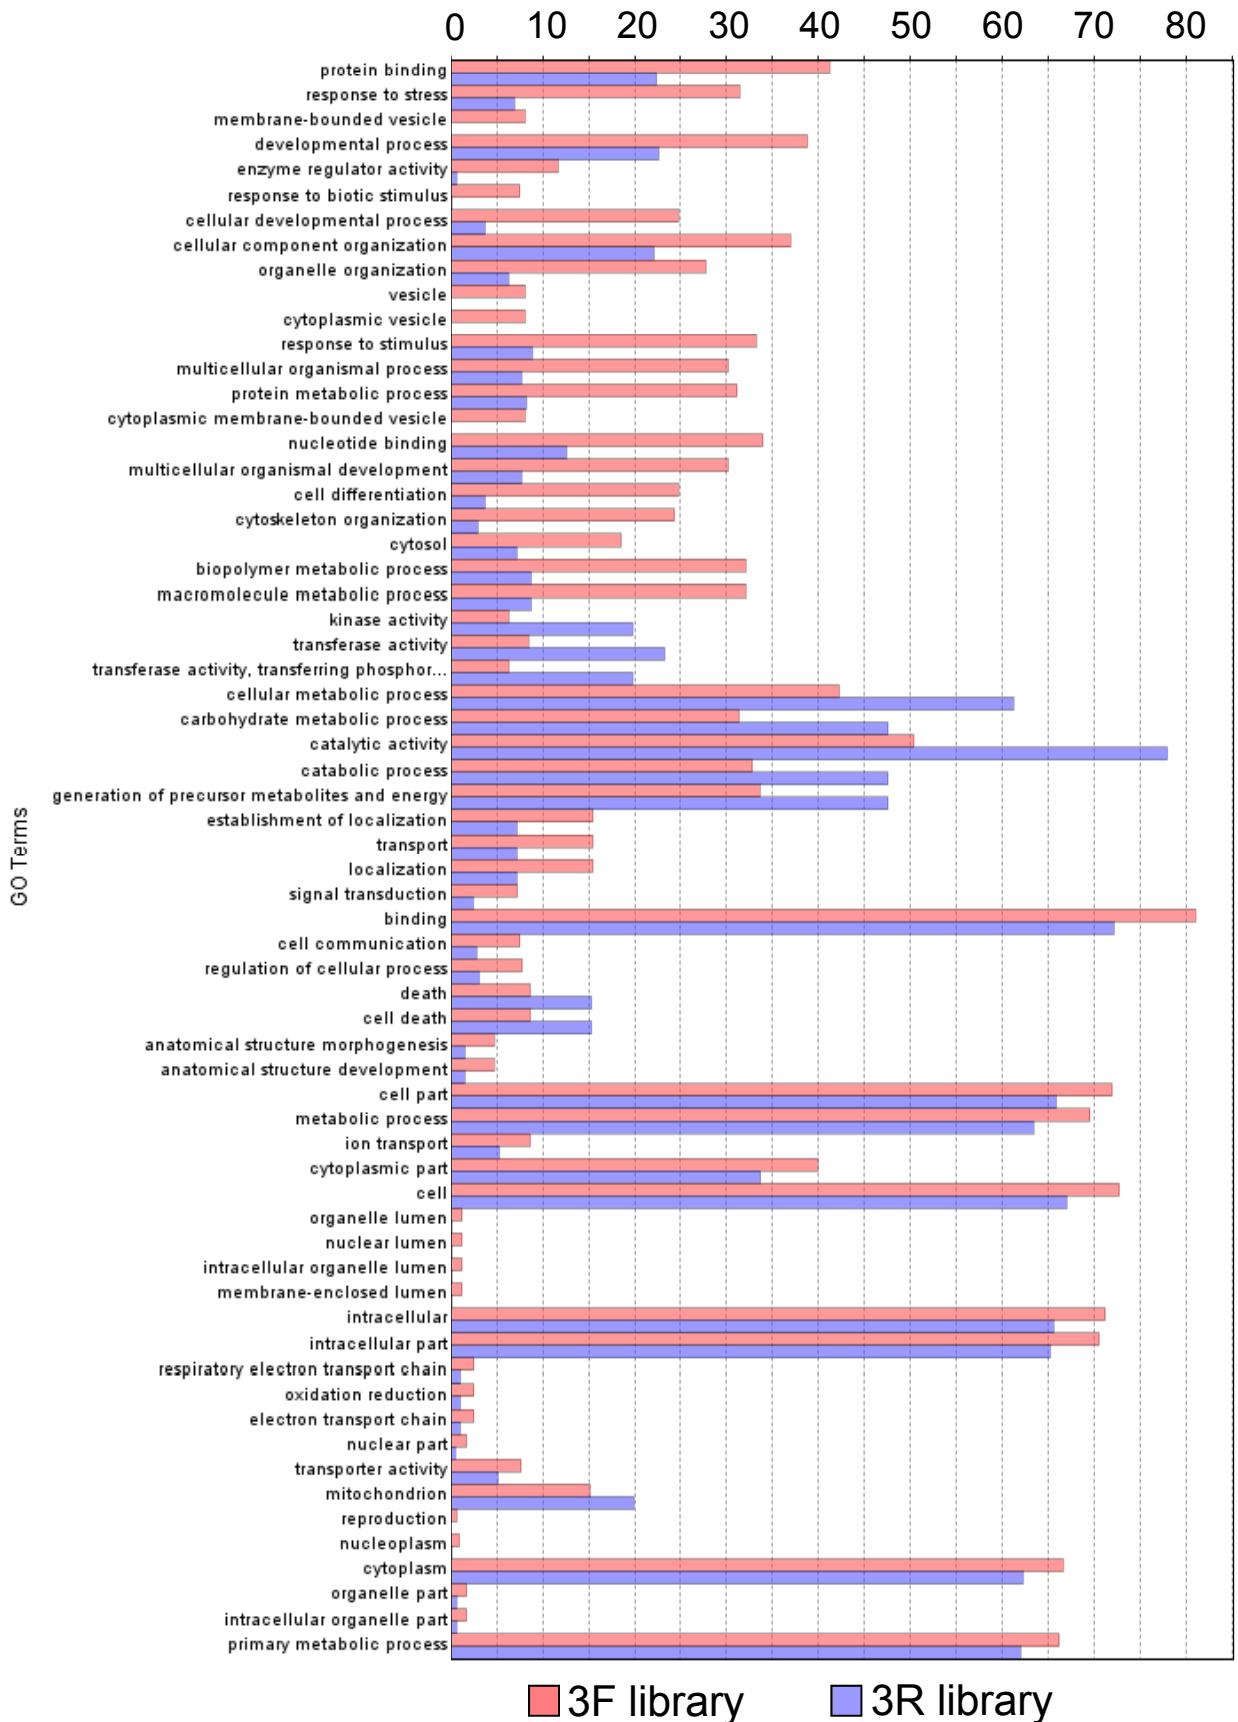

# Differential GO-term distribution (%) sequences

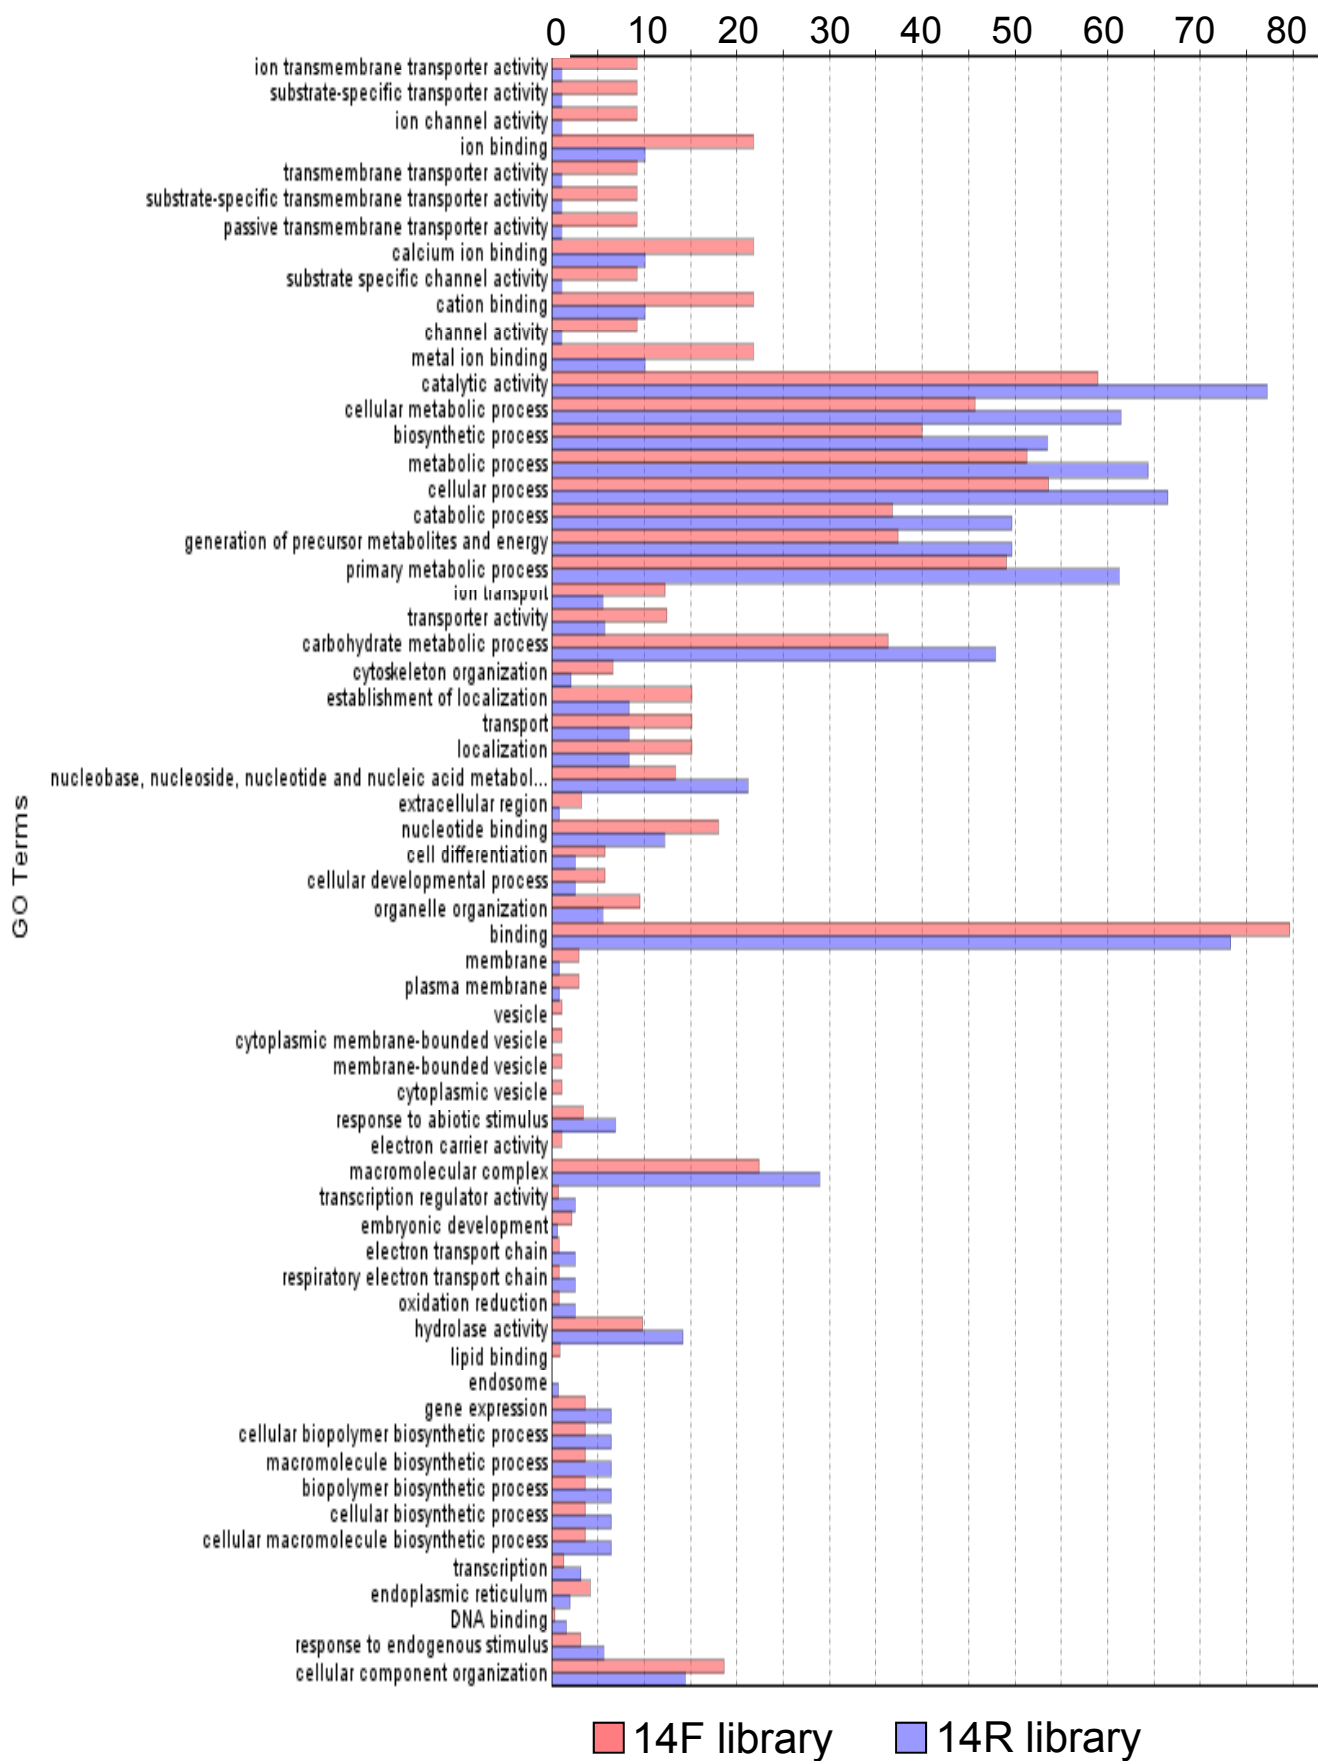

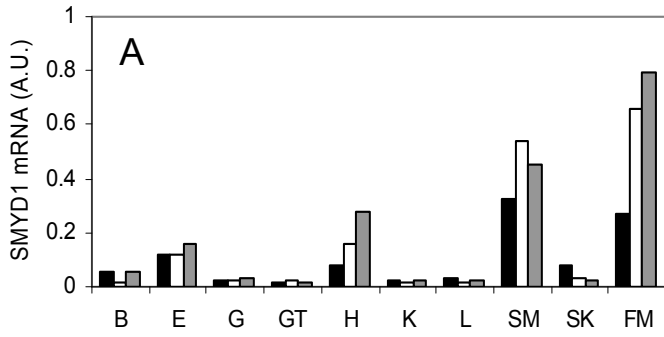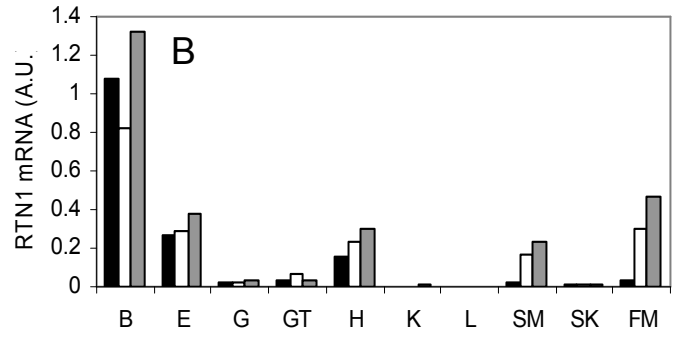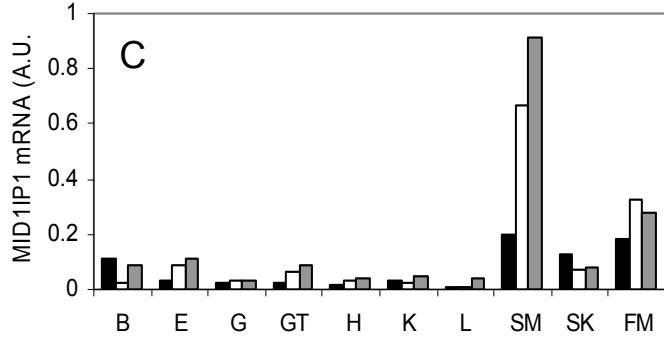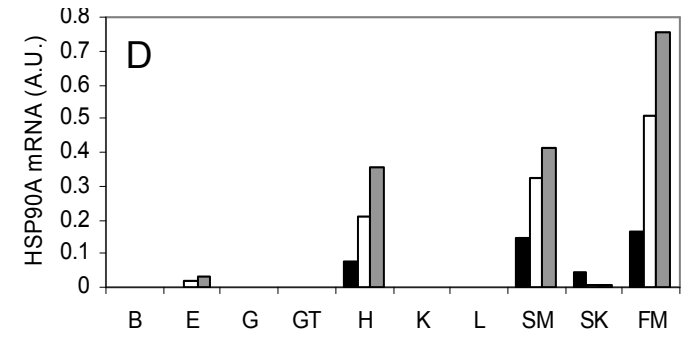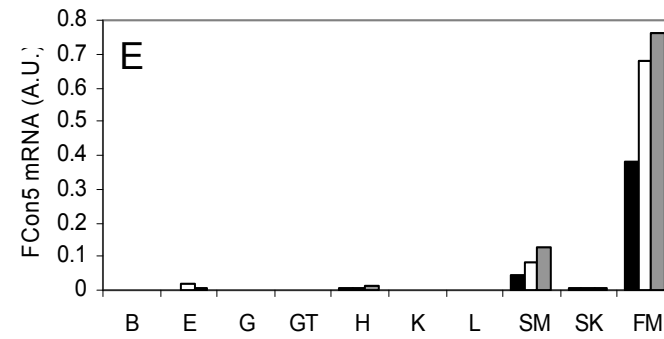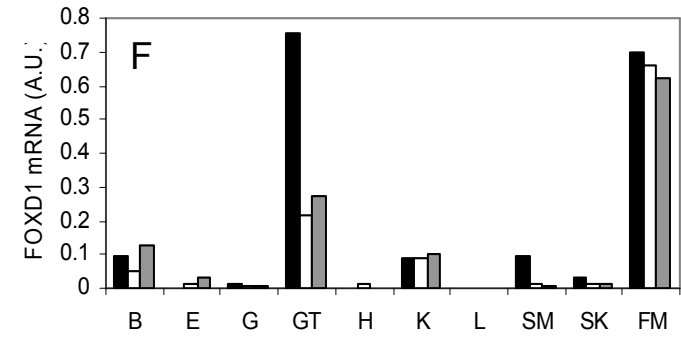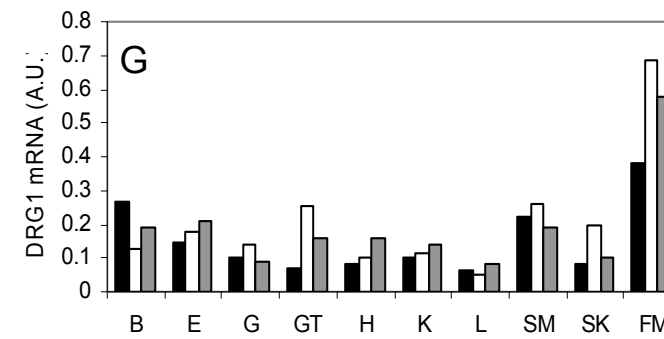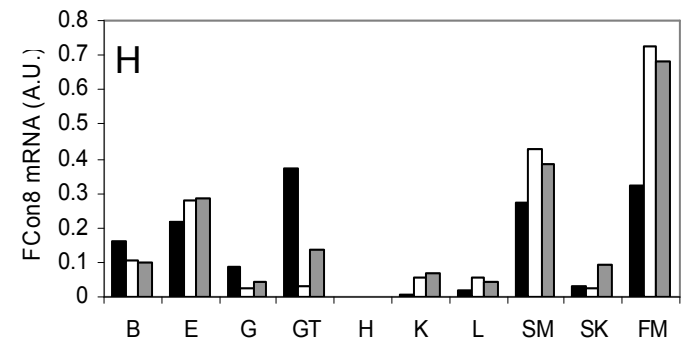

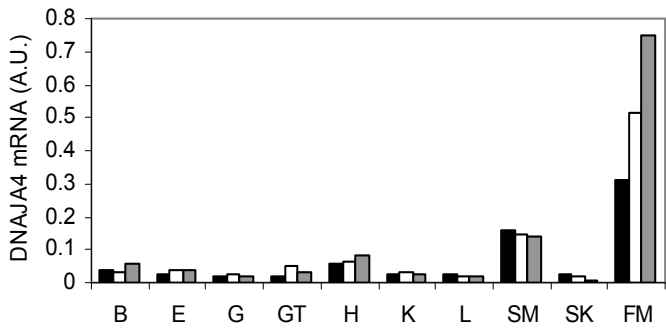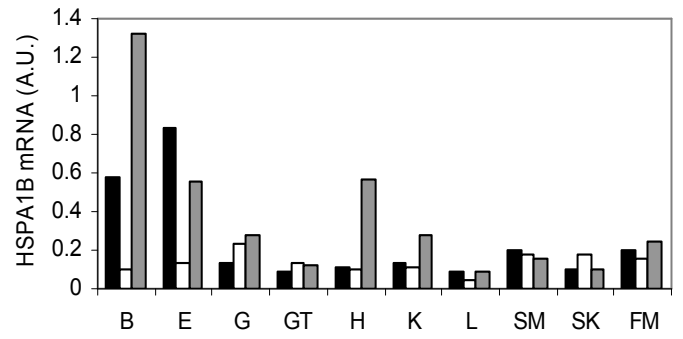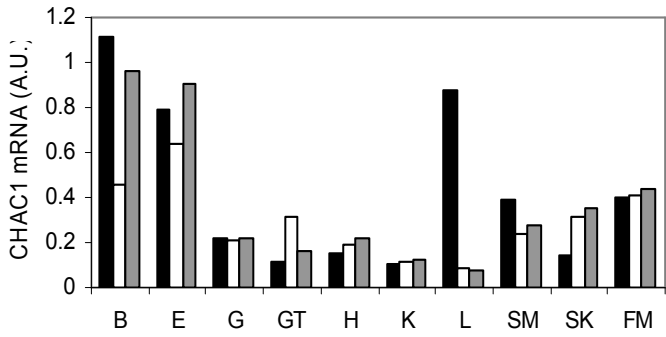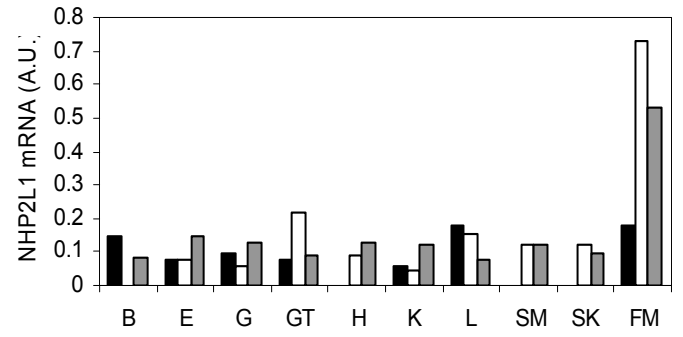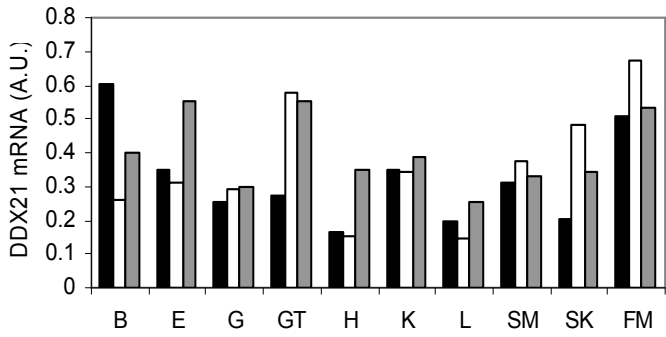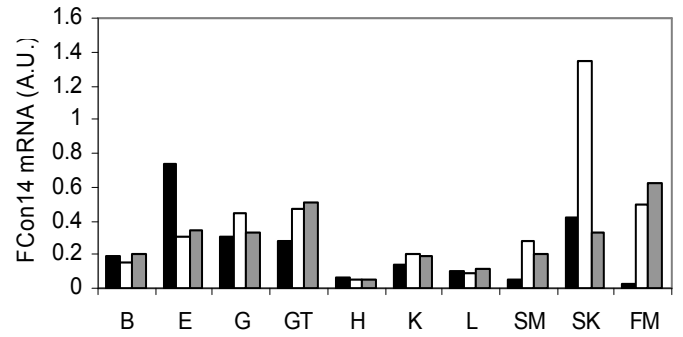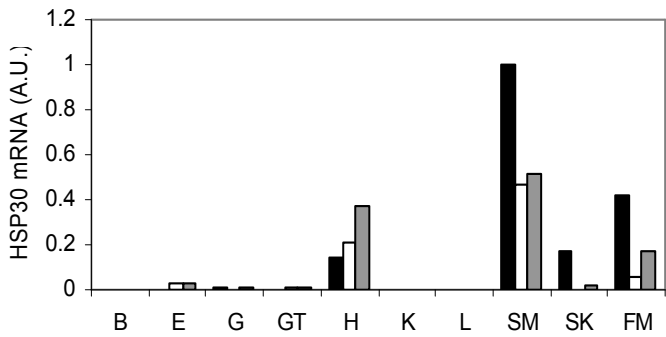

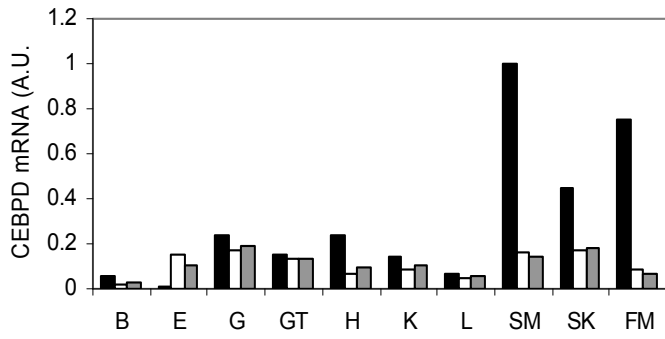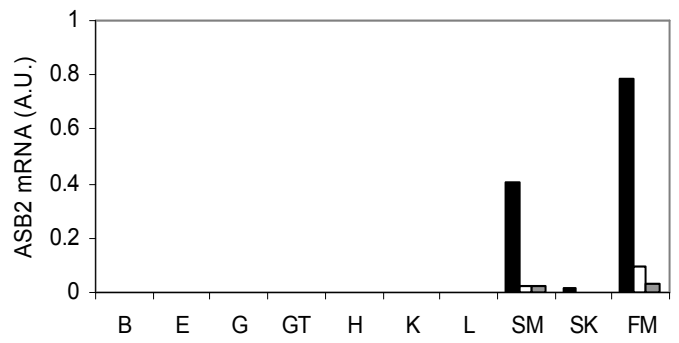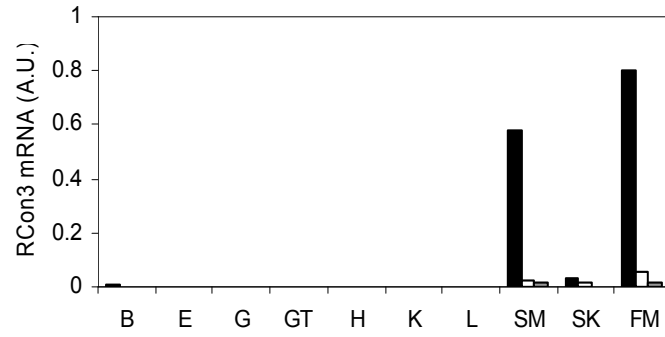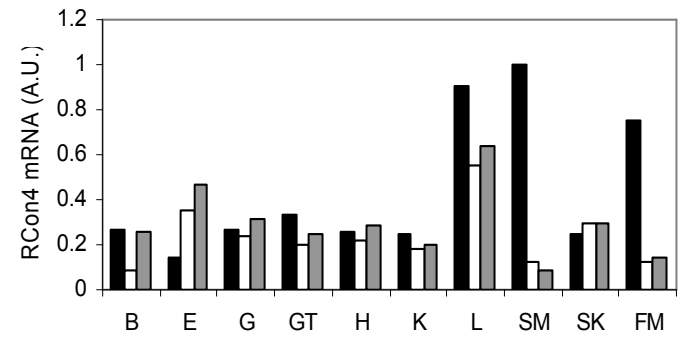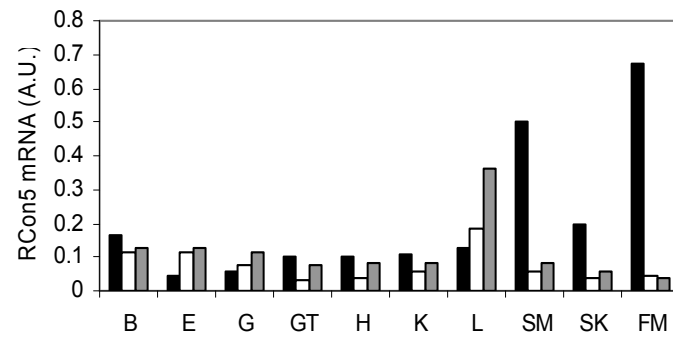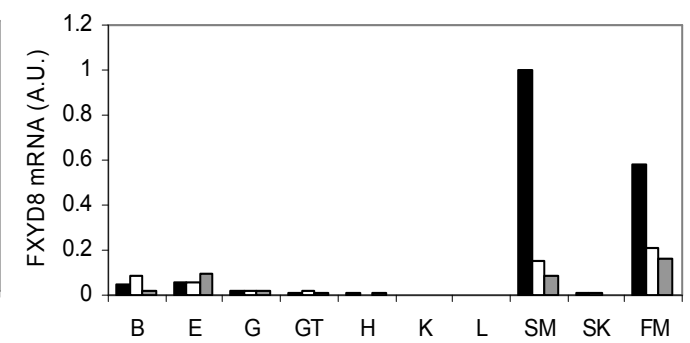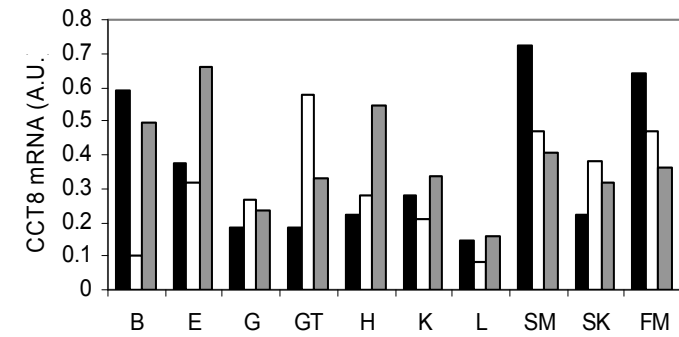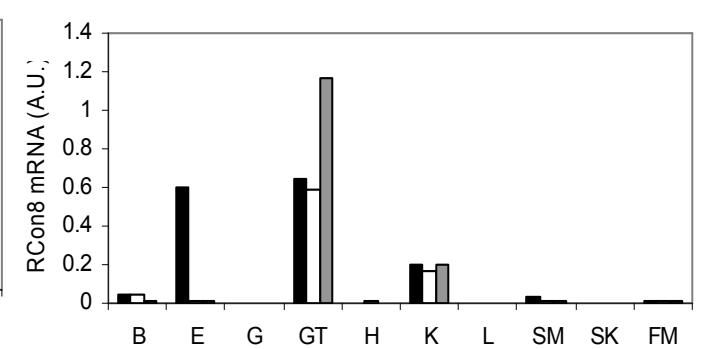

Supplement: 71a59cf59467a2a8f14c07d5af7eb125_figS1-S7.pdf [file 71a59cf59467a2a8f14c07d5af7eb125_figS1-S7.pdf]
