# Supplementary material
Source: PubMed Central journal article supplement (PMC2957792)
Supplement: tableS1.pdf [file tableS1.pdf]

## 1 Supplementary Table.1 List of primers used to amplify the &lt;81.8 kb region.

| Primer Name | Forward primer              | Primer Name | Reverse primer           | Product Size (bp) |
|-------------|-----------------------------|-------------|--------------------------|-------------------|
| Ch9-81kbF1  | TTGTGTGCCTATGCATGTTAATG     | Ch9-81kbR1  | CAGGTCCTTATGGTGGCCTTC    | 825               |
| Ch9-81kbF2  | ACTTACTGGGGTTTCCTTCACTC     | Ch9-81kbR2  | ACATAGAGCTGCAAACCAAGTTC  | 838               |
| Ch9-81kbF3  | TGGGTGATATCTGTCCAATAAG      | Ch9-81kbR3  | AAGACCCATCTCATTCTTAGCAC  | 809               |
| Ch9-81kbF4  | TCCAAAGAAATCTAATGCTCACC     | Ch9-81kbR4  | CAGCTATTGGAGGACAGTGTTATG | 802               |
| Ch9-81kbF5  | TCCTGAAAGTAAGAACTCCAGATG    | Ch9-81kbR5  | GATGGTAGAGATGGTGATGAGC   | 811               |
| Ch9-81kbF6  | AGGGTACTGTCCCAGAAGAGAG      | Ch9-81kbR6  | AACAAGGCCATTGTGATAGTCAG  | 811               |
| Ch9-81kbF7  | TGCCAGTGTATGATGAAGTTAGG     | Ch9-81kbR7  | AAGTGACTTTCTCAGGGCCATAC  | 808               |
| Ch9-81kbF8  | ACCGGTCATCACAAGTAAAC        | Ch9-81kbR8  | TTCTCAAGGTGAGAGCATATTGAC | 849               |
| Ch9-81kbF9  | CACAGTCTTGAGTTCTACTGGGG     | Ch9-81kbR9  | TCTAGCTTGTCCATCACACTGAG  | 828               |
| Ch9-81kbF10 | AAAGAAGAATATTGGTTGGGCTC     | Ch9-81kbR10 | GAGAGGGGACACTCTGATCTATTC | 859               |
| Ch9-81kbF11 | CAGCTCTGCTTCCACTCACTG       | Ch9-81kbR11 | GCTATAGAGGTGCCAGGAAGAC   | 804               |
| Ch9-81kbF12 | AGGGTACTGGGAAGAAGACTCAG     | Ch9-81kbR12 | GTCAGGATCCAGATTGACTTG    | 853               |
| Ch9-81kbF13 | CAGACTAAATGGGTTGGTAAAGC     | Ch9-81kbR13 | TTCCCTTCTTCTAGAGAAGTTC   | 796               |
| Ch9-81kbF14 | AACTGTAGGAGAAGGAAATTGCTC    | Ch9-81kbR14 | GGAAGAAACATGTCTTGAAGAGTC | 806               |
| Ch9-81kbF15 | CCAGCCCTTGTATCTTAATCC       | Ch9-81kbR15 | AAATCACTCTTGAAACCACCTC   | 909               |
| Ch9-81kbF16 | ATTGGGAAAGAGAAGTATGGGTG     | Ch9-81kbR16 | GTGGAGACCAGAGGCTAACTTG   | 807               |
| Ch9-81kbF17 | ATTTAAGATGCAGATGAACCAGG     | Ch9-81kbR17 | TTGCTGGTAATACTAAACATTGGG | 806               |
| Ch9-81kbF18 | TTTATAGTGACAGGCGTACCTGC     | Ch9-81kbR18 | GCTGGTGAAGTACTAGCACTTAG  | 824               |
| Ch9-81kbF19 | TAAACGTAAATGAGTAGCCCCAG     | Ch9-81kbR19 | GCAGGATAATACAGCCATTTGAG  | 812               |
| Ch9-81kbF20 | ACCTCCATTCTCCAAGTCCAG       | Ch9-81kbR20 | CAATTCTCTTCTTCTACCTTCGC  | 817               |
| Ch9-81kbF21 | GGTTAACAAAACAGAAATTCGGG     | Ch9-81kbR21 | TGCAAATCTGTGTGCAGGAAC    | 833               |
| Ch9-81kbF22 | ACTAGACATTAAGTGCAAGATAAATCC | Ch9-81kbR22 | TCTTTCTTCTTCTTCTCTCTCC   | 814               |
| Ch9-81kbF23 | TTTTATCATTTCACCTGGTTGTAG    | Ch9-81kbR23 | ACTCTACTGGATCCCTGTGGG    | 804               |
| Ch9-81kbF24 | ATAAGACCCCAACGCTCTCAC       | Ch9-81kbR24 | GGAACTAGAGGTTCAAAGGCTG   | 807               |
| Ch9-81kbF25 | CTGCTTCCATCCTCAGAAACC       | Ch9-81kbR25 | ACTTGAGCTATGAAGCTGGAGAC  | 849               |
| Ch9-81kbF26 | CAACACAGAGCAGCATTGTCC       | Ch9-81kbR26 | AGCTCCAAATGTCTAGACTGCAC  | 838               |
| Ch9-81kbF27 | AAAGCTCTTTGGACATCAGCTC      | Ch9-81kbR27 | TTTCCAATTACATGTGCTGAGAG  | 806               |
| Ch9-81kbF28 | GTGTCAGCATCCTCCAGTGAC       | Ch9-81kbR28 | AACAGCTCGGGTAGGTACAGG    | 795               |
| Ch9-81kbF29 | AAACCTCAGAAAAGGATAGAAACAAC  | Ch9-81kbR29 | ATAAGTGTGGAGGCCACAGGAC   | 805               |
| Ch9-81kbF30 | GGCTAGCCTTCCTAAGCTACTATG    | Ch9-81kbR30 | CTCGAAGCGTAATAGCTACCATC  | 807               |

|             |                             |             |                             |     |
|-------------|-----------------------------|-------------|-----------------------------|-----|
| Ch9-81kbF31 | ATAGGCTTGGATAGCCTCCAG       | Ch9-81kbR31 | AAGACATAGCTGGCCTTGGTG       | 840 |
| Ch9-81kbF32 | TTCTTCTCCTCTCTCTACCTCC      | Ch9-81kbR32 | AAGATTATTTTCATCCACAGGAATC   | 803 |
| Ch9-81kbF33 | GATAAATGCCTGGATGTTGATG      | Ch9-81kbR33 | CCACTTTTCAGCATACTCCATTAAG   | 811 |
| Ch9-81kbF34 | TTTATTCCACTTAGAAAGGACAACAC  | Ch9-81kbR34 | TAGAGGCACCATTCTGACCTTAG     | 804 |
| Ch9-81kbF35 | AGCAAACTACAGATGCCAAAAC      | Ch9-81kbR35 | TATGTAGGTTGGAGAACTCCTGG     | 884 |
| Ch9-81kbF36 | TCCAGAAAGCTGAGAGTCAGAAG     | Ch9-81kbR36 | GCTGAGAAGAGAGTACATTCTTTAGTG | 799 |
| Ch9-81kbF37 | ACACCTGCAGAGACCTCCTTC       | Ch9-81kbR37 | ATCTGGGAGATAATTCAGTGGAC     | 793 |
| Ch9-81kbF38 | CCCTACTCAGTGCTGGAGTTATC     | Ch9-81kbR38 | CTAGAGAACCCTGACTATCGCAC     | 849 |
| Ch9-81kbF40 | ACACTTTGCACTTGAAGTGGTG      | Ch9-81kbR40 | TTTCAAGAAGAAAGAACCCTTTG     | 839 |
| Ch9-81kbF41 | CACACCAGATTGCTTTAGAGGTG     | Ch9-81kbR41 | ACTACACCTGGGTTCCCTCAC       | 813 |
| Ch9-81kbF42 | GAGTAAGAAGCTCTGTGGCAGTG     | Ch9-81kbR42 | TCCATCCACATCTTGAGTTCTTC     | 809 |
| Ch9-81kbF43 | CATCAGCAATCAGGTATCCAGAC     | Ch9-81kbR43 | CAAACATTGAACTGAGAACGGG      | 794 |
| Ch9-81kbF45 | TGGATACAGAAAATGTGGTACATC    | Ch9-81kbR45 | AGGCTGAAATTGGAGCTGTAGTG     | 806 |
| Ch9-81kbF46 | AGAACCCTCTGCATCCTTCTG       | Ch9-81kbR46 | GTGTAGCCGGTTTAAGGACACAG     | 810 |
| Ch9-81kbF47 | GAACAGGTGCTGATGGAAGTG       | Ch9-81kbR47 | CTGAAATGCATAGCAGTGACC       | 800 |
| Ch9-81kbF48 | AAAGCACAGGAGATTTGTAGATCC    | Ch9-81kbR48 | TGTAAGTGGCTGATTTTGTGTGTC    | 834 |
| Ch9-81kbF49 | TTGAGAAAATGCCTTCCTTACAG     | Ch9-81kbR49 | CAGTCTGTTCCAAGCCATTCC       | 801 |
| Ch9-81kbF50 | TTGTAAAGTTGACATACAGCTATCAGG | Ch9-81kbR50 | GATTTCTTAAGTGAAACAGTG       | 811 |
| Ch9-81kbF51 | CACTTCATCTTTCTTGGGTTGTC     | Ch9-81kbR51 | GAGTTCTCATTGTTCCGAG         | 832 |
| Ch9-81kbF52 | TCAAATGAACATTAATGCATCC      | Ch9-81kbR52 | CTAGGTCTTTGGGCTAATGCC       | 830 |
| Ch9-81kbF53 | GAGGAAGCAAAAGATGTGGAAC      | Ch9-81kbR53 | TTTTCTGTCTCCCTGTCTGTG       | 804 |
| Ch9-81kbF54 | ACATGTTAGGTAGAAAGGATACAAAAC | Ch9-81kbR54 | CAGTGAAGTACTGGTGGGG         | 808 |
| Ch9-81kbF57 | AGTCATCAGTTAGAGCCAAAAGC     | Ch9-81kbR57 | CCTTCAGCTCTTTCAATCCTTTC     | 843 |
| Ch9-81kbF58 | CTGTCTCCTGAGAGACTCTGCC      | Ch9-81kbR58 | GACTCTCCCTGAGTCCCCTAAG      | 807 |
| Ch9-81kbF59 | AAGTAATAACTTCTGTGGATTCTCC   | Ch9-81kbR59 | GAATCTGAAGGTAGGGACTCG       | 832 |
| Ch9-81kbF60 | TGAAGACAGAATTCTCTACATTCCTC  | Ch9-81kbR60 | TCTAGGCTCTGGCATCTCTGG       | 809 |
| Ch9-81kbF61 | AGAAATCTGCAAGGTATTTCTGG     | Ch9-81kbR61 | TGGAAGTGTGTGAGTGACAGG       | 808 |
| Ch9-81kbF62 | ATTTAACACAAAGGCTTCCCATC     | Ch9-81kbR62 | ACTGATATCATGGGCTCACCTTG     | 815 |
| Ch9-81kbF63 | GCAGTTGAAAGATGACAAGAAGC     | Ch9-81kbR63 | AGGCAAGTAAAATCCGCTAAG       | 810 |
| Ch9-81kbF64 | ATGATCAGGGGACTGGGAAAC       | Ch9-81kbR64 | ATTCTATGAATGCCACATGGTTG     | 869 |
| Ch9-81kbF65 | AGTTAAGGCAGGATCAGAAGGTG     | Ch9-81kbR65 | TAAGAGAATCAGGCTATCAAGGC     | 836 |
| Ch9-81kbF66 | GGTCACTTTTCCAATCACTCTG      | Ch9-81kbR66 | GCTAAGGGCTGGCCTATCATC       | 849 |
| Ch9-81kbF67 | TAGACAATAAGGCACCCTGCTAC     | Ch9-81kbR67 | ATCTATCTTGCAGTCTTGAGGGC     | 825 |
| Ch9-81kbF72 | CTACAGAAATCACCATGAGGCTG     | Ch9-81kbR72 | TTAGATGAGTCAGGAGATGGGAG     | 807 |
| Ch9-81kbF73 | AACGTCTTCTCCCTCCCCTAC       | Ch9-81kbR73 | CAGGAAGTCGTCATGATAGTCTG     | 823 |

|              |                             |              |                             |     |
|--------------|-----------------------------|--------------|-----------------------------|-----|
| Ch9-81kbF74  | AACGTTAGACAGTCCTCCTACACC    | Ch9-81kbR74  | TCAGATGTGTTCACTTAGCTGTTG    | 835 |
| Ch9-81kbF75  | AGCCTAGGAGAAAAGTTTGGGAC     | Ch9-81kbR75  | GTAGAAATGTCTGGCCCTGGAG      | 827 |
| Ch9-81kbF76  | ATTTCTCCAAAGAAAGGCAGAAG     | Ch9-81kbR76  | TGCATTTACAGAGGCCATAGTTG     | 843 |
| Ch9-81kbF77  | TGCTATAGGTAAGGAGTCTTATTCCAC | Ch9-81kbR77  | GATTATGATGGGAAAGCCTCTG      | 853 |
| Ch9-81kbF78  | GGACACTTAAACCTCACGAAAAC     | Ch9-81kbR78  | AGGCATTAAGGATGACTGTTTG      | 807 |
| Ch9-81kbF79  | AACAGTGTCTATCCCCTCAGAGTC    | Ch9-81kbR79  | ACCCTTCTCTTGGAAACAGACATC    | 845 |
| Ch9-81kbF80  | CAGGGAGAATGTGATGAGAGATG     | Ch9-81kbR80  | TGACTTGTGACCTCTTAACCCAC     | 804 |
| Ch9-81kbF81  | TCAGAGGAGAACAAGTCTTCCAG     | Ch9-81kbR81  | CTAGACTGTGGGTCTGGTGGAG      | 848 |
| Ch9-81kbF82  | CTGCCCAAGAGGAGACTTAC        | Ch9-81kbR82  | GTCACCAACATCTCATCCAAGTG     | 802 |
| Ch9-81kbF83  | TTGTTCTAGCATGAGGTTGAATG     | Ch9-81kbR83  | CTTGACCTTGGGTATGGCCTC       | 805 |
| Ch9-81kbF84  | ATCACACCAGCAGCTAACCTTG      | Ch9-81kbR84  | TGGTAGTCTCCTGAATAGAAAGC     | 806 |
| Ch9-81kbF85  | ATGGAGTCTACCTTCTGTCCCTC     | Ch9-81kbR85  | GGAAGGCTGTCCCTCTTTTATTAG    | 830 |
| Ch9-81kbF86  | CCTAACTGGAATGCGCTGAC        | Ch9-81kbR86  | CTCACTGGAAGGCAGAGGTTG       | 795 |
| Ch9-81kbF88  | TATTCCTAAAAGAAGCCTCAGGG     | Ch9-81kbR88  | CTGAAATCTCAGGCAATATCAGC     | 839 |
| Ch9-81kbF89  | TTTGTCTGAGATCTATAAAGGTTTG   | Ch9-81kbR89  | AATGGGGCATTAAATCAGAAGC      | 828 |
| Ch9-81kbF90  | CTCTGGACTTGCTGAAAGCTG       | Ch9-81kbR90  | GCCTTGAGCCATATGTTATGTTG     | 798 |
| Ch9-81kbF91  | GGAAAAGAACAAAACCTCATGG      | Ch9-81kbR91  | TCCTTCTCCCAGAATAAAATTCC     | 814 |
| Ch9-81kbF92  | GGCCCATAGAAATGAAGACATTC     | Ch9-81kbR92  | ATATGCAGCTTTGGGAGTTACAG     | 815 |
| Ch9-81kbF93  | GTAGCACTGCCATCAATAGAAC      | Ch9-81kbR93  | GCTAAGGTAACACTGTAGTTGGGG    | 817 |
| Ch9-81kbF94  | CAGTGTATGGCAGAATTGTTAGG     | Ch9-81kbR94  | GTGTGTGTGCATTAGTGTGTGTG     | 805 |
| Ch9-81kbF101 | TGACAGAGGGAAGGATATTGAAC     | Ch9-81kbR101 | GAGTAAAACCTTTCTTCCTGACG     | 795 |
| Ch9-81kbF102 | CAGATCTTGTTGGCACTCTTAC      | Ch9-81kbR102 | TTGTGGTGTGATAAGACTCGTG      | 808 |
| Ch9-81kbF103 | ACCTTATCCCTCTAGATTGGTCC     | Ch9-81kbR103 | AAAACAGCAAAGAAGGGAACCTTG    | 796 |
| Ch9-81kbF104 | TTCCAAGTAAAATACACCCATAACC   | Ch9-81kbR104 | ACATTCAGTCTGTGCCAGTAAG      | 802 |
| Ch9-81kbF105 | GCTGGAAACCAAAGAAAGTGTTC     | Ch9-81kbR105 | GACTCAACAAACTGTAACCCAGC     | 815 |
| Ch9-81kbF106 | TTGTGTGTCTAGATGAGCAAACC     | Ch9-81kbR106 | CAGCTTAGTGTTTGCAGCTTG       | 913 |
| Ch9-81kbF107 | CATTAATGAGGGGCTGACCTAAC     | Ch9-81kbR107 | GATTATTGACAGATTGACTCTAAAAGC | 807 |
| Ch9-81kbF108 | GCTACAGTGAGCTTTATTCTACACC   | Ch9-81kbR108 | ATGGAAGCTTTCTGAATTTACCC     | 802 |
| Ch9-81kbF109 | ATCCCCTAATAGTGCCACTTCTC     | Ch9-81kbR109 | TGCTATAATGGATGAGAATCAGG     | 798 |
| Ch9-81kbF110 | CTGCCCTGTTTGAGTTCATGTC      | Ch9-81kbR110 | GGACATCCATGTACACAAAATAAAG   | 820 |
| Ch9-81kbF111 | ACGTCTACATGAGAGGGTTGTTG     | Ch9-81kbR111 | GTGACTGTGAAATGCCATGTG       | 793 |
| Ch9-81kbF113 | CTTTCCCCTACATCCCCAATC       | Ch9-81kbR113 | ATGCTAGTTCTCAAGGAGGCAG      | 800 |
| Ch9-81kbF114 | CTCAGAAGTGGCAGGTGAGTC       | Ch9-81kbR114 | TGACTCTTGAACCTCCTCTCTTTC    | 811 |
| Ch9-81kbF115 | GCTTCTCAGTTGCAGTACCAAAC     | Ch9-81kbR115 | TAGGTGTGATGTAAACACCCTGC     | 851 |
| Ch9-81kbF116 | GAAGAATGGTCACTTTAGTGAGGTC   | Ch9-81kbR116 | CTCTAAGACGGCTGGTATCTCTG     | 816 |

|                    |                         |                    |                            |      |
|--------------------|-------------------------|--------------------|----------------------------|------|
| Ch9-81kbF117       | AGGAATTACCAGAGATACCAGCC | Ch9-81kbR117       | CAGCATATTCATGATCCTAAGGC    | 840  |
| RNO9-81kb-Gap-F 1  | GGGAGAGGGAGGAGAGAGAATCT | RNO9-81kb-Gap-R 1  | CGACTTTGTTTATTCCCTTGCCATCC | 361  |
| RNO9-81kb-Gap-F 2  | GCTCAGAAAAGGAAGGAAGGA   | RNO9-81kb-Gap-R 2  | GAGAGCGTTGGGGTCTTATG       | 662  |
| RNO9-81kb-Gap-F 3  | CCCACAGGGATCCAGTAGAG    | RNO9-81kb-Gap-R 3  | AGGCACTGAGGGAAGTCTGT       | 650  |
| RNO9-81kb-Gap-F 4  | CTTGGTATCCGTGCCCTTTA    | RNO9-81kb-Gap-R 4  | TGTCCTGGAGGATGCTGAC        | 655  |
| RNO9-81kb-Gap-F 5  | GATCTCTGGGGCTCACTGAC    | RNO9-81kb-Gap-R 5  | TGGGCTCTCACAAGTACCAA       | 300  |
| RNO9-81kb-Gap-F 6  | TTTCTTAATTGCCCGTGATG    | RNO9-81kb-Gap-R 6  | CTGAGAAGAAGGGAGGCAGA       | 710  |
| RNO9-81kb-Gap-F 7  | TCTCAGCTCCAGAATCAAG     | RNO9-81kb-Gap-R 7  | CTGTCTGTCCATCCATCCATT      | 709  |
| RNO9-81kb-Gap-F 8  | GACAGATGCTCAGACCAATCC   | RNO9-81kb-Gap-R 8  | GCAATGCAGACTTTCTATTTGG     | 600  |
| RNO9-81kb-Gap-F 9  | CCTCTTTTTGTGGCAGGTTT    | RNO9-81kb-Gap-R 9  | CAAGGACCTTCATGCTATGCT      | 520  |
| RNO9-81kb-Gap-F 10 | TGAGAAGACATGCCTGGATTT   | RNO9-81kb-Gap-R 10 | GACCACAAGTCCTTTATGGGATA    | 540  |
| RNO9-81kb-Gap-F 11 | GGACTTGTGGTCAGACTTAACAG | RNO9-81kb-Gap-R 11 | GGAGGGGTACCACTGCATAG       | 960  |
| RNO9-81kb-Gap-F 12 | AAATCTGACCACAGCAAGGG    | RNO9-81kb-Gap-R 12 | CCTTTTCTAAGAAATCCAACAG     | 848  |
| RNO9-81kb-Gap-F 13 | AGGTGGGGGAAAGATTTGTT    | RNO9-81kb-Gap-R 13 | AGGACACCGCTGAGGTAAGA       | 668  |
| RNO9-81kb-Gap-F 14 | CAGGATCAACAGCGAAGAACT   | RNO9-81kb-Gap-R 14 | GTCCCTGTTGGAGGAATTGA       | 704  |
| RNO9-81kb-Gap-F 15 | GACCCCGTTCTCAGTTCAAT    | RNO9-81kb-Gap-R 15 | TCCATTTTCTATGAACTCCA       | 705  |
| RNO9-81kb-Gap-F 16 | GCCTCAAGTCCAGAAATTGG    | RNO9-81kb-Gap-R 16 | TTGACTGACCCTGGACTCTG       | 870  |
| RNO9-81kb-Gap-F 19 | CCTCTGCCACATCATCAGAA    | RNO9-81kb-Gap-R 19 | GGTGGAGAATCCACAGGAAG       | 1104 |
| RNO9-81kb-Gap-F 20 | GAGTGTGGCCTTAGCCAGATAC  | RNO9-81kb-Gap-R 20 | CCTATCATCGCCTTTAACCTTT     | 961  |
| RNO9-81kb-Gap-F 22 | CTGGAAACCAGCATCTAGACAAC | RNO9-81kb-Gap-R 22 | GAGGGCCTTAAAAATAGTGTGGT    | 623  |
| RNO9-81kb-Gap-F 23 | AGATGGACACTTAAACCTCACGA | RNO9-81kb-Gap-R 23 | GTTGGCACATGGATAAACCTAAA    | 846  |
| RNO9-81kb-Gap-F 24 | ATCGCCCTTCTATGTTCTACCTC | RNO9-81kb-Gap-R 24 | ACCCTTCTCTTGGAACAGACATC    | 778  |
| RNO9-81kb-Gap-F 25 | AGCTGAGAGAGAGCATGCAATTA | RNO9-81kb-Gap-R 25 | CCCTGAGGCTTCTTTAGGAATA     | 687  |
| RNO9-81kb-Gap-F 26 | TGGGACAGGAAATAAGAACAAAA | RNO9-81kb-Gap-R 26 | CCAGAATAAAATTCCTGTGGAAA    | 504  |
| RNO9-81kb-Gap-F 27 | TCTGCAGTCTTCATTTGTGTGTT | RNO9-81kb-Gap-R 27 | GATAGTTAAAGGTGGTGTGTGTG    | 822  |
| RNO9-81kb-Gap-F 32 | AAAACAAAACATCACCACATTT  | RNO9-81kb-Gap-R 32 | AGATGCAGAGTTAGAAGCTGTGG    | 825  |
| RNO9-81kb-Gap-F 33 | CTACAGATCTTGGTTGGCACTCT | RNO9-81kb-Gap-R 33 | GATAAGGTAGGGGCAAGTCAAGT    | 715  |
| RNO9-81kb-Gap-F 34 | TGTTCCCAAATAAATGACACAGA | RNO9-81kb-Gap-R 34 | TCACCTTGATTGGTTAATGAAGA    | 460  |
| RNO9-81kb-Gap-F 35 | CAAGTGACCTGATTCTCATCCAT | RNO9-81kb-Gap-R 35 | TTAGGTAACCAGACCCAGAAAGG    | 806  |
| RNO9-81kb-Gap-F 36 | GATGGGTCATCAGTTAAGAGCAC | RNO9-81kb-Gap-R 36 | TTACTCCAGTCAGAAAGGCAAAG    | 761  |

- 2 Supplemental Table 2. DNA variants between S and S.R(D9Mco95-D9Mco98) in the  
 3 <81.8 kb region

| <b>S. No.</b> | <b>Location based on BN<br/>(Ensembl Release 56,<br/>www.ensembl.org)</b> | <b>S</b> | <b>S.R(D9Mco95-D9Mco98)</b> | <b>Ref: BN<br/>(Ensembl<br/>Release 56)</b> |
|---------------|---------------------------------------------------------------------------|----------|-----------------------------|---------------------------------------------|
| 1             | 73141167                                                                  | C        | T                           | C                                           |
| 2             | 73141540.1                                                                | :        | A                           | :                                           |
| 3             | 73141540.2                                                                | :        | A                           | :                                           |
| 4             | 73142009                                                                  | T        | C                           | T                                           |
| 5             | 73142039                                                                  | C        | T                           | C                                           |
| 6             | 73142042                                                                  | T        | :                           | T                                           |
| 7             | 73142043                                                                  | C        | :                           | C                                           |
| 8             | 73142044                                                                  | T        | :                           | T                                           |
| 9             | 73142045                                                                  | C        | :                           | C                                           |
| 10            | 73142046                                                                  | T        | :                           | T                                           |
| 11            | 73142047                                                                  | C        | :                           | C                                           |
| 12            | 73142048                                                                  | T        | :                           | T                                           |
| 13            | 73142049                                                                  | C        | :                           | C                                           |
| 14            | 73142050                                                                  | T        | :                           | T                                           |
| 15            | 73142051                                                                  | C        | :                           | C                                           |
| 16            | 73142052                                                                  | T        | :                           | T                                           |
| 17            | 73142053                                                                  | C        | :                           | C                                           |
| 18            | 73142054                                                                  | T        | :                           | T                                           |
| 19            | 73142055                                                                  | C        | :                           | C                                           |
| 20            | 73142056                                                                  | T        | :                           | T                                           |
| 21            | 73142057                                                                  | C        | :                           | C                                           |
| 22            | 73142058                                                                  | T        | :                           | T                                           |
| 23            | 73142059                                                                  | C        | :                           | C                                           |
| 24            | 73142060                                                                  | T        | :                           | T                                           |
| 25            | 73142061                                                                  | C        | :                           | C                                           |
| 26            | 73142062                                                                  | T        | :                           | T                                           |
| 27            | 73142063                                                                  | C        | :                           | C                                           |
| 28            | 73142064                                                                  | T        | :                           | T                                           |
| 29            | 73142065                                                                  | C        | :                           | C                                           |
| 30            | 73142251                                                                  | A        | G                           | A                                           |
| 31            | 73143245                                                                  | C        | G                           | C                                           |
| 32            | 73144420                                                                  | G        | A                           | G                                           |
| 33            | 73145987                                                                  | T        | G                           | T                                           |
| 34            | 73146735                                                                  | G        | A                           | G                                           |
| 35            | 73147172                                                                  | A        | T                           | A                                           |
| 36            | 73147368                                                                  | C        | T                           | C                                           |
| 37            | 73147522                                                                  | T        | C                           | T                                           |
| 38            | 73147552                                                                  | G        | T                           | G                                           |

|    |            |   |   |   |
|----|------------|---|---|---|
| 39 | 73148043.1 | : | G | : |
| 40 | 73148044.1 | : | G | : |
| 41 | 73148098   | G | A | G |
| 42 | 73148909   | C | T | T |
| 43 | 73151392   | G | C | C |
| 44 | 73151712   | G | T | G |
| 45 | 73151807   | T | C | T |
| 46 | 73152596   | A | G | A |
| 47 | 73152889   | G | T | G |
| 48 | 73152940   | T | C | T |
| 49 | 73153774   | C | T | C |
| 50 | 73154226   | A | : | A |
| 51 | 73154227   | C | : | C |
| 52 | 73154228   | A | : | A |
| 53 | 73154229   | C | : | C |
| 54 | 73154230   | A | : | A |
| 55 | 73154231   | C | : | C |
| 56 | 73154232   | A | : | A |
| 57 | 73154233   | C | : | C |
| 58 | 73154234   | A | : | A |
| 59 | 73154235   | C | : | C |
| 60 | 73154236   | A | : | A |
| 61 | 73154237   | C | : | C |
| 62 | 73154238   | A | : | A |
| 63 | 73154239   | C | : | C |
| 64 | 73154240   | A | : | A |
| 65 | 73154241   | C | : | C |
| 66 | 73154242   | A | : | A |
| 67 | 73154243   | C | : | C |
| 68 | 73154244   | A | : | A |
| 69 | 73154245   | C | : | C |
| 70 | 73154246   | A | : | A |
| 71 | 73154247   | C | : | C |
| 72 | 73154313   | A | G | A |
| 73 | 73154314   | T | C | T |
| 74 | 73155140   | A | G | A |
| 75 | 73155158   | G | A | G |
| 76 | 73155534   | A | G | A |
| 77 | 73155545   | G | A | G |
| 78 | 73157049   | A | G | A |
| 79 | 73157342   | A | G | A |
| 80 | 73158779   | G | C | G |
| 81 | 73158834.1 | : | G | : |
| 82 | 73160114   | G | A | G |
| 83 | 73160151   | T | C | T |

|     |            |   |   |   |
|-----|------------|---|---|---|
| 84  | 73160336   | A | G | A |
| 85  | 73160526   | C | : | C |
| 86  | 73160527   | A | : | A |
| 87  | 73160528   | C | : | C |
| 88  | 73160529   | A | : | A |
| 89  | 73160530   | C | : | C |
| 90  | 73160531   | A | : | A |
| 91  | 73160532   | C | : | C |
| 92  | 73160533   | A | : | A |
| 93  | 73160534   | C | : | C |
| 94  | 73160535   | A | : | A |
| 95  | 73160536   | C | : | C |
| 96  | 73160537   | A | : | A |
| 97  | 73161335   | A | G | A |
| 98  | 73161545   | C | : | C |
| 99  | 73162398.1 | G | : | : |
| 100 | 73162398.2 | A | : | : |
| 101 | 73162398.3 | T | : | : |
| 102 | 73162398.4 | G | : | : |
| 103 | 73162594   | T | C | C |
| 104 | 73162901   | T | C | C |
| 105 | 73162957   | T | C | C |
| 106 | 73162969   | T | C | C |
| 107 | 73162973   | T | C | C |
| 108 | 73163254   | G | A | G |
| 109 | 73163381   | T | : | T |
| 110 | 73163382   | G | : | G |
| 111 | 73163383   | T | : | T |
| 112 | 73163384   | G | : | G |
| 113 | 73163385   | T | : | T |
| 114 | 73163386   | G | : | G |
| 115 | 73163387   | T | : | T |
| 116 | 73163388   | G | : | G |
| 117 | 73163389   | T | : | T |
| 118 | 73163390   | G | : | G |
| 119 | 73163744   | A | C | A |
| 120 | 73164190   | T | C | T |
| 121 | 73164207   | C | G | C |
| 122 | 73164209   | G | C | G |
| 123 | 73164213   | C | G | C |
| 124 | 73164225.1 | : | T | : |
| 125 | 73164225.2 | : | G | : |
| 126 | 73164225.3 | : | T | : |
| 127 | 73164225.4 | : | G | : |
| 128 | 73164225.5 | : | T | : |

|     |             |   |   |   |
|-----|-------------|---|---|---|
| 129 | 73164225.6  | : | C | : |
| 130 | 73164225.7  | : | T | : |
| 131 | 73164225.8  | : | G | : |
| 132 | 73164225.9  | : | T | : |
| 133 | 73164225.1  | : | G | : |
| 134 | 73164225.11 | : | T | : |
| 135 | 73164225.12 | : | G | : |
| 136 | 73164225.13 | : | T | : |
| 137 | 73164225.14 | : | G | : |
| 138 | 73164225.15 | : | C | : |
| 139 | 73164225.16 | : | C | : |
| 140 | 73164225.17 | : | T | : |
| 141 | 73164225.18 | : | G | : |
| 142 | 73164225.19 | : | T | : |
| 143 | 73164225.2  | : | G | : |
| 144 | 73164225.21 | : | T | : |
| 145 | 73164225.22 | : | G | : |
| 146 | 73164225.23 | : | T | : |
| 147 | 73164225.24 | : | C | : |
| 148 | 73164225.25 | : | T | : |
| 149 | 73164225.26 | : | G | : |
| 150 | 73164225.27 | : | T | : |
| 151 | 73164225.28 | : | G | : |
| 152 | 73164225.29 | : | T | : |
| 153 | 73164225.3  | : | G | : |
| 154 | 73164225.31 | : | T | : |
| 155 | 73164225.32 | : | C | : |
| 156 | 73164225.33 | : | T | : |
| 157 | 73164225.34 | : | A | : |
| 158 | 73164225.35 | : | T | : |
| 159 | 73164225.36 | : | G | : |
| 160 | 73164225.37 | : | T | : |
| 161 | 73164225.38 | : | C | : |
| 162 | 73164225.39 | : | T | : |
| 163 | 73164225.4  | : | G | : |
| 164 | 73164225.41 | : | T | : |
| 165 | 73164225.42 | : | G | : |
| 166 | 73164225.43 | : | T | : |
| 167 | 73164225.44 | : | G | : |
| 168 | 73164225.45 | : | T | : |
| 169 | 73164225.46 | : | C | : |
| 170 | 73164225.47 | : | T | : |
| 171 | 73164225.48 | : | G | : |
| 172 | 73164225.49 | : | T | : |
| 173 | 73164225.5  | : | G | : |



|     |             |   |   |   |
|-----|-------------|---|---|---|
| 174 | 73164286    | T | C | T |
| 175 | 73164431    | C | T | C |
| 176 | 73164751    | T | C | T |
| 177 | 73164757    | A | T | A |
| 178 | 73164758    | C | A | C |
| 179 | 73164759    | A | T | A |
| 180 | 73164760    | T | A | T |
| 181 | 73164762    | T | C | T |
| 182 | 73164766    | A | T | A |
| 183 | 73164767    | T | A | T |
| 184 | 73164768    | A | T | A |
| 185 | 73164769    | C | A | C |
| 186 | 73164773    | T | C | T |
| 187 | 73164777    | A | T | A |
| 188 | 73164778    | T | A | T |
| 189 | 73164779    | A | T | A |
| 190 | 73164780    | C | A | C |
| 191 | 73164788    | T | C | T |
| 192 | 73164792    | C | T | C |
| 193 | 73164793    | A | : | A |
| 194 | 73164794    | C | : | C |
| 195 | 73164929    | T | C | T |
| 196 | 73164943    | T | C | T |
| 197 | 73165069.1  | : | G | : |
| 198 | 73165069.2  | : | T | : |
| 199 | 73165069.3  | : | T | : |
| 200 | 73165069.4  | : | G | : |
| 201 | 73165069.5  | : | G | : |
| 202 | 73165069.6  | : | T | : |
| 203 | 73165069.7  | : | T | : |
| 204 | 73165069.8  | : | G | : |
| 205 | 73165069.9  | : | G | : |
| 206 | 73165069.10 | : | T | : |
| 207 | 73165069.11 | : | T | : |
| 208 | 73165069.12 | : | G | : |
| 209 | 73165069.13 | : | G | : |
| 210 | 73165069.14 | : | T | : |
| 211 | 73165069.15 | : | T | : |
| 212 | 73165069.16 | : | G | : |
| 213 | 73165069.17 | : | G | : |
| 214 | 73165069.18 | : | T | : |
| 215 | 73165069.19 | : | T | : |
| 216 | 73165069.20 | : | G | : |
| 217 | 73165172    | A | G | A |
| 218 | 73165189.1  | : | G | : |

|     |            |   |   |   |
|-----|------------|---|---|---|
| 219 | 73165307   | A | G | A |
| 220 | 73165656.1 | : | T | : |
| 221 | 73165656.2 | : | T | : |
| 222 | 73165656.3 | : | A | : |
| 223 | 73165656.4 | : | T | : |
| 224 | 73165656.5 | : | T | : |
| 225 | 73165656.6 | : | T | : |
| 226 | 73165656.7 | : | A | : |
| 227 | 73165656.8 | : | T | : |
| 228 | 73165660   | C | T | C |
| 229 | 73165976   | A | T | A |
| 230 | 73166084   | T | : | T |
| 231 | 73166085   | A | : | A |
| 232 | 73166086   | T | : | T |
| 233 | 73166087   | A | : | A |
| 234 | 73166088   | T | : | T |
| 235 | 73166089   | A | : | A |
| 236 | 73166090   | T | : | T |
| 237 | 73166091   | A | : | A |
| 238 | 73166092   | T | : | T |
| 239 | 73166093   | A | : | A |
| 240 | 73166094   | T | : | T |
| 241 | 73166095   | A | : | A |
| 242 | 73166096   | T | : | T |
| 243 | 73166097   | A | : | A |
| 244 | 73166104   | C | : | C |
| 245 | 73166105   | A | : | A |
| 246 | 73166106   | C | : | C |
| 247 | 73166107   | A | : | A |
| 248 | 73166108   | C | : | C |
| 249 | 73166109   | A | : | A |
| 250 | 73166110   | C | : | C |
| 251 | 73166111   | A | : | A |
| 252 | 73166112   | C | : | C |
| 253 | 73166113   | A | : | A |
| 254 | 73166114   | C | : | C |
| 255 | 73166115   | A | : | A |
| 256 | 73166120   | G | C | G |
| 257 | 73166122   | G | C | G |
| 258 | 73166124   | G | T | G |
| 259 | 73167521   | A | G | A |
| 260 | 73167796   | A | T | A |
| 261 | 73167872   | G | A | G |
| 262 | 73167976   | C | T | C |
| 263 | 73167975   | A | G | A |

|     |             |   |   |   |
|-----|-------------|---|---|---|
| 264 | 73169009    | G | A | G |
| 265 | 73169679.1  | : | G | : |
| 266 | 73169679.2  | : | G | : |
| 267 | 73169679.3  | : | T | : |
| 268 | 73169679.4  | : | T | : |
| 269 | 73169961    | A | C | A |
| 270 | 73169973    | C | A | C |
| 271 | 73170074    | A | G | A |
| 272 | 73170879    | G | A | G |
| 273 | 73170888    | A | C | A |
| 274 | 73170894    | G | A | G |
| 275 | 73171062    | T | G | G |
| 276 | 73171270    | A | G | A |
| 277 | 73171795    | T | C | T |
| 278 | 73172558    | A | C | A |
| 279 | 73172803    | T | C | T |
| 280 | 73172861    | C | T | C |
| 281 | 73174520    | T | : | T |
| 282 | 73174521    | T | : | T |
| 283 | 73175051    | A | G | A |
| 284 | 73175425    | T | G | T |
| 285 | 73176094    | C | T | C |
| 286 | 73176187    | A | C | A |
| 287 | 73176453    | G | T | G |
| 288 | 73176968    | G | A | G |
| 289 | 73176974.1  | : | A | : |
| 290 | 73176974.2  | : | A | : |
| 291 | 73176974.3  | : | T | : |
| 292 | 73176974.4  | : | A | : |
| 293 | 73176974.5  | : | A | : |
| 294 | 73176974.6  | : | A | : |
| 295 | 73176974.7  | : | T | : |
| 296 | 73176974.8  | : | A | : |
| 297 | 73176974.9  | : | A | : |
| 298 | 73176974.10 | : | G | : |
| 299 | 73176974.11 | : | T | : |
| 300 | 73176974.12 | : | A | : |
| 301 | 73176974.13 | : | A | : |
| 302 | 73176974.14 | : | A | : |
| 303 | 73176974.15 | : | T | : |
| 304 | 73176974.16 | : | A | : |
| 305 | 73177666    | C | G | C |
| 306 | 73177729    | T | : | T |
| 307 | 73177729.1  | T | : | : |
| 308 | 73177729.2  | T | : | : |

|     |             |   |   |   |
|-----|-------------|---|---|---|
| 309 | 73177735    | G | A | G |
| 310 | 73177824    | C | T | C |
| 311 | 73181165    | C | T | C |
| 312 | 73181183    | C | T | C |
| 313 | 73182907    | C | T | C |
| 314 | 73182918    | T | C | T |
| 315 | 73182927    | T | G | T |
| 316 | 73183787    | A | G | A |
| 317 | 73183925    | C | A | C |
| 318 | 73183930    | C | G | C |
| 319 | 73183989    | T | : | T |
| 320 | 73183990    | A | : | A |
| 321 | 73183991    | A | : | A |
| 322 | 73183992    | A | : | A |
| 323 | 73183993    | A | : | A |
| 324 | 73184174    | T | G | T |
| 325 | 73184175    | C | T | C |
| 326 | 73184176    | A | C | A |
| 327 | 73184178    | T | C | T |
| 328 | 73184179.1  | : | A | : |
| 329 | 73184179.2  | : | T | : |
| 330 | 73184179.3  | : | A | : |
| 331 | 73184179.4  | : | G | : |
| 332 | 73184179.5  | : | A | : |
| 333 | 73184179.6  | : | C | : |
| 334 | 73184179.7  | : | A | : |
| 335 | 73184179.8  | : | C | : |
| 336 | 73184179.9  | : | T | : |
| 337 | 73184179.10 | : | T | : |
| 338 | 73184274    | G | A | G |
| 339 | 73184639    | C | T | C |
| 340 | 73185191    | A | G | A |
| 341 | 73185243    | T | C | T |
| 342 | 73185277    | C | A | C |
| 343 | 73186185.1  | : | A | : |
| 344 | 73186185.2  | : | G | : |
| 345 | 73186185.3  | : | A | : |
| 346 | 73186287    | G | C | G |
| 347 | 73186345    | T | C | T |
| 348 | 73186899    | T | C | T |
| 349 | 73187832    | G | T | G |
| 350 | 73188400    | T | C | T |
| 351 | 73189858    | C | T | C |
| 352 | 73190022    | A | G | A |
| 353 | 73190265    | G | A | G |

|     |            |   |   |   |
|-----|------------|---|---|---|
| 354 | 73190576   | T | A | T |
| 355 | 73190594   | A | T | A |
| 356 | 73190602   | A | T | A |
| 357 | 73190603   | G | C | G |
| 358 | 73190656   | T | A | T |
| 359 | 73190657   | C | G | C |
| 360 | 73190665.1 | : | G | : |
| 361 | 73190666   | T | G | T |
| 362 | 73190680   | A | T | A |
| 363 | 73190684   | G | : | G |
| 364 | 73190685   | G | : | G |
| 365 | 73190686   | T | : | T |
| 366 | 73190687   | A | : | A |
| 367 | 73190688   | G | : | G |
| 368 | 73190689   | G | : | G |
| 369 | 73190690   | G | : | G |
| 370 | 73190691   | T | : | T |
| 371 | 73190692   | T | : | T |
| 372 | 73190693   | A | : | A |
| 373 | 73190694   | G | : | G |
| 374 | 73190695   | G | : | G |
| 375 | 73190696   | G | : | G |
| 376 | 73190697   | T | : | T |
| 377 | 73190698   | T | : | T |
| 378 | 73190699   | T | : | T |
| 379 | 73190700   | G | : | G |
| 380 | 73190701   | G | : | G |
| 381 | 73190702   | G | : | G |
| 382 | 73190703   | T | : | T |
| 383 | 73190704   | T | : | T |
| 384 | 73190705   | A | : | A |
| 385 | 73190706   | G | : | G |
| 386 | 73190707   | G | : | G |
| 387 | 73190708   | G | : | G |
| 388 | 73190709   | T | : | T |
| 389 | 73190710   | T | : | T |
| 390 | 73190711   | A | : | A |
| 391 | 73190712   | G | : | G |
| 392 | 73190713   | G | : | G |
| 393 | 73190714   | G | : | G |
| 394 | 73191138   | A | G | A |
| 395 | 73191380   | T | C | T |
| 396 | 73192628   | T | C | T |
| 397 | 73192924   | A | G | A |
| 398 | 73192989   | G | A | G |

|     |            |   |   |   |
|-----|------------|---|---|---|
| 399 | 73193350   | C | T | C |
| 400 | 73193352.1 | : | A | : |
| 401 | 73193352.2 | : | G | : |
| 402 | 73193352.3 | : | G | : |
| 403 | 73193352.4 | : | C | : |
| 404 | 73193352.5 | : | A | : |
| 405 | 73193616   | A | G | A |
| 406 | 73193693   | A | C | A |
| 407 | 73193829.1 | : | G | : |
| 408 | 73193833   | T | A | T |
| 409 | 73193834   | T | A | T |
| 410 | 73193835   | T | A | T |
| 411 | 73193912   | G | A | G |
| 412 | 73193971   | A | G | A |
| 413 | 73196777   | G | A | G |
| 414 | 73197393   | G | C | G |
| 415 | 73197464   | A | G | A |
| 416 | 73197678   | C | A | C |
| 417 | 73198665   | T | C | T |
| 418 | 73198919   | C | T | C |
| 419 | 73199937   | A | G | A |
| 420 | 73200086   | T | C | T |
| 421 | 73200328   | C | G | C |
| 422 | 73200366   | C | A | C |
| 423 | 73200896   | A | C | A |
| 424 | 73200932   | G | A | G |
| 425 | 73201130.1 | : | A | : |
| 426 | 73201295   | G | A | G |
| 427 | 73201526   | G | A | G |
| 428 | 73201734   | A | : | A |
| 429 | 73201735   | T | : | T |
| 430 | 73201736   | T | : | T |
| 431 | 73201737   | A | : | A |
| 432 | 73201738   | T | : | T |
| 433 | 73201739   | T | : | T |
| 434 | 73201740   | A | : | A |
| 435 | 73201741   | T | : | T |
| 436 | 73201742   | T | : | T |
| 437 | 73201743   | A | : | A |
| 438 | 73201744   | T | : | T |
| 439 | 73201745   | T | : | T |
| 440 | 73201746   | A | : | A |
| 441 | 73201747   | T | : | T |
| 442 | 73201748   | T | : | T |
| 443 | 73203294   | G | A | G |

|     |             |   |   |   |
|-----|-------------|---|---|---|
| 444 | 73203565    | C | G | C |
| 445 | 73205131    | C | T | C |
| 446 | 73205718    | A | : | A |
| 447 | 73209762    | A | G | A |
| 448 | 73210062    | A | G | A |
| 449 | 73211368    | T | C | T |
| 450 | 73211385    | G | C | G |
| 451 | 73211388    | T | A | T |
| 452 | 73211491    | A | G | A |
| 453 | 73212892    | G | A | G |
| 454 | 73213682    | T | G | T |
| 455 | 73213930    | C | T | C |
| 456 | 73213932.1  | : | C | : |
| 457 | 73213932.2  | : | C | : |
| 458 | 73213932.3  | : | T | : |
| 459 | 73213932.4  | : | G | : |
| 460 | 73213932.5  | : | T | : |
| 461 | 73213932.6  | : | G | : |
| 462 | 73213932.7  | : | G | : |
| 463 | 73213932.8  | : | T | : |
| 464 | 73213932.9  | : | T | : |
| 465 | 73213932.10 | : | C | : |
| 466 | 73213932.11 | : | C | : |
| 467 | 73213932.12 | : | C | : |
| 468 | 73213932.13 | : | T | : |
| 469 | 73213932.14 | : | G | : |
| 470 | 73213932.15 | : | T | : |
| 471 | 73213932.16 | : | G | : |
| 472 | 73213932.17 | : | G | : |
| 473 | 73213932.18 | : | T | : |
| 474 | 73213932.19 | : | T | : |
| 475 | 73213932.20 | : | C | : |
| 476 | 73213932.21 | : | C | : |
| 477 | 73213932.22 | : | C | : |
| 478 | 73213932.23 | : | T | : |
| 479 | 73213932.24 | : | G | : |
| 480 | 73213932.25 | : | T | : |
| 481 | 73213932.26 | : | G | : |
| 482 | 73213932.27 | : | G | : |
| 483 | 73213932.28 | : | C | : |
| 484 | 73213932.29 | : | T | : |
| 485 | 73213932.30 | : | C | : |
| 486 | 73214437    | G | T | G |
| 487 | 73215754    | G | A | G |
| 488 | 73217204    | A | C | A |

|     |             |   |   |   |
|-----|-------------|---|---|---|
| 489 | 73218673    | C | A | C |
| 490 | 73218768    | T | : | T |
| 491 | 73218769    | T | : | T |
| 492 | 73218770    | A | : | A |
| 493 | 73218771    | C | : | C |
| 494 | 73218772    | T | : | T |
| 495 | 73218773    | G | : | G |
| 496 | 73218774    | A | : | A |
| 497 | 73218775    | T | : | T |
| 498 | 73218776    | A | : | A |
| 499 | 73218777    | A | : | A |
| 500 | 73219782    | T | C | T |
| 501 | 73220641    | C | A | C |
| 502 | 73220644    | G | A | G |
| 503 | 73220736    | G | A | G |
| 504 | 73220783    | C | T | C |
| 505 | 73220864    | G | A | G |
| 506 | 73221140    | C | T | C |
| 507 | 73221289    | A | G | A |
| 508 | 73221314    | G | A | G |
| 509 | 73221368    | G | A | G |
| 510 | 73221397    | G | A | G |
| 511 | 73221424    | G | A | G |
| 512 | 73221446    | C | T | C |
| 513 | 73221457    | G | T | G |
| 514 | 73221643    | T | C | T |
| 515 | 73221699.1  | : | T | : |
| 516 | 73221699.2  | : | G | : |
| 517 | 73221699.3  | : | G | : |
| 518 | 73221699.4  | : | G | : |
| 519 | 73221699.5  | : | T | : |
| 520 | 73221699.6  | : | C | : |
| 521 | 73221699.7  | : | T | : |
| 522 | 73221699.8  | : | C | : |
| 523 | 73221699.9  | : | T | : |
| 524 | 73221699.1  | : | G | : |
| 525 | 73221699.11 | : | T | : |
| 526 | 73221699.12 | : | C | : |
| 527 | 73221699.13 | : | C | : |
| 528 | 73221699.14 | : | T | : |
| 529 | 73221699.15 | : | T | : |
| 530 | 73221699.16 | : | G | : |
| 531 | 73221699.17 | : | C | : |
| 532 | 73221699.18 | : | C | : |
| 533 | 73221699.19 | : | C | : |



|     |             |   |   |   |
|-----|-------------|---|---|---|
| 534 | 73221699.2  | : | C | : |
| 535 | 73221699.21 | : | C | : |
| 536 | 73221699.22 | : | A | : |
| 537 | 73221699.23 | : | T | : |
| 538 | 73221699.24 | : | C | : |
| 539 | 73221699.25 | : | C | : |
| 540 | 73221699.26 | : | C | : |
| 541 | 73221699.27 | : | C | : |
| 542 | 73221699.28 | : | T | : |
| 543 | 73221699.29 | : | G | : |
| 544 | 73221699.3  | : | G | : |
| 545 | 73221699.31 | : | A | : |
| 546 | 73221699.32 | : | G | : |
| 547 | 73221699.33 | : | C | : |
| 548 | 73221699.34 | : | T | : |
| 549 | 73221699.35 | : | T | : |
| 550 | 73221699.36 | : | T | : |
| 551 | 73221699.37 | : | T | : |
| 552 | 73221699.38 | : | A | : |
| 553 | 73221699.39 | : | A | : |
| 554 | 73221699.4  | : | T | : |
| 555 | 73221699.41 | : | G | : |
| 556 | 73221699.42 | : | A | : |
| 557 | 73221699.43 | : | A | : |
| 558 | 73221699.44 | : | C | : |
| 559 | 73221699.45 | : | A | : |
| 560 | 73221699.46 | : | C | : |
| 561 | 73221699.47 | : | T | : |
| 562 | 73221699.48 | : | C | : |
| 563 | 73221699.49 | : | C | : |

4

5

6

7

8

9

10

11

12
